# Supplementary material for: Foliar application of salicylic acid inhibits the cadmium uptake and accumulation in lettuce (Lactuca sativa L.)
Source: Front Plant Sci. 2023 Aug 11;14:1200106. doi: 10.3389/fpls.2023.1200106 (PMC10452881; doi:10.3389/fpls.2023.1200106)
Supplement: Supplementary file 1 [file Table_1.xlsx]

## Sheet: Sheet1
	Plant height	Root length	Shoot biomass	Shoot biomass	Total chlorophyll	Carotenoid	Pn	Gs	Ci	Tr	Proline	Relative conductivity	Soluble sugar	Soluble protein	POD	SOD	CAT	Cd content in shoot	Cd content in root	Translocation factor	Nramp2	Nramp5	HMA3	HMA4	WRKY6	SAMT			Plant height	Root length	Shoot biomass	Shoot biomass	Total chlorophyll	Carotenoid	Pn	Gs	Ci	Tr	Proline	Relative conductivity	Soluble sugar	Soluble protein	POD	SOD	CAT	Cd content in shoot	Cd content in root	Translocation factor	Nramp2
Plant height	1	0.80069	0.90568	0.83335	0.21295	0.74189	0.83601	-0.48134	-0.46613	-0.79739	-0.24899	-0.67912	0.91272	-0.93863	-0.96245	-0.91504	0.92813	-0.79017	-0.68514	-0.7408	-0.32424	-0.73548	0.3272	0.78216	0.85383	-0.7085		Plant height	**	**	**	**		**	**	*		**		**	**	**	**	**	**	**	**	**
Root length	0.80069	1	0.83338	0.82564	0.03559	0.62028	0.63729	-0.3735	-0.35545	-0.71748	-0.0741	-0.5855	0.77797	-0.87997	-0.85605	-0.78869	0.89738	-0.84744	-0.76647	-0.8062	-0.33405	-0.49669	0.49508	0.70121	0.74262	-0.66752		Root length	**	**	**	**		**	**			**		*	**	**	**	**	**	**	**	**
Shoot biomass	0.90568	0.83338	1	0.80651	-0.04927	0.53817	0.72393	-0.49097	-0.24482	-0.64335	-0.25338	-0.53115	0.92281	-0.9319	-0.89819	-0.86222	0.89633	-0.9057	-0.87379	-0.85947	-0.47466	-0.5306	0.27855	0.86166	0.88957	-0.57948		Shoot biomass	**	**	**	**		*	**	*		**		*	**	**	**	**	**	**	**	**	*
Shoot biomass	0.83335	0.82564	0.80651	1	0.31163	0.76941	0.79624	-0.51835	-0.45665	-0.84218	-0.37198	-0.72767	0.79707	-0.80848	-0.83149	-0.85401	0.926	-0.82414	-0.67756	-0.82806	-0.04612	-0.74902	0.38894	0.53061	0.73145	-0.71457		Shoot biomass	**	**	**	**		**	**	*		**		**	**	**	**	**	**	**	**	**
Total chlorophyll	0.21295	0.03559	-0.04927	0.31163	1	0.47606	0.4821	-0.14392	-0.75353	-0.55987	-0.45279	-0.64507	0.12071	0.00437	-0.2057	-0.17515	0.2456	-0.00619	0.21132	-0.08794	0.43426	-0.72154	0.19426	-0.33278	-0.0614	-0.24684		Total chlorophyll					**	*	*		**	*		**
Carotenoid	0.74189	0.62028	0.53817	0.76941	0.47606	1	0.80625	-0.3483	-0.60206	-0.90317	-0.14753	-0.76306	0.59963	-0.68055	-0.73519	-0.80347	0.74826	-0.53906	-0.3271	-0.52914	0.17485	-0.77133	0.38543	0.44264	0.45045	-0.7872		Carotenoid	**	**	*	**	*	**	**		**	**		**	**	**	**	**	**	*		*
Pn	0.83601	0.63729	0.72393	0.79624	0.4821	0.80625	1	-0.39433	-0.68179	-0.90973	-0.33545	-0.79195	0.76442	-0.74426	-0.85167	-0.83747	0.85337	-0.66389	-0.48882	-0.66568	-0.01408	-0.84176	0.33754	0.51832	0.5996	-0.69409		Pn	**	**	**	**	*	**	**		**	**		**	**	**	**	**	**	**	*	**
Gs	-0.48134	-0.3735	-0.49097	-0.51835	-0.14392	-0.3483	-0.39433	1	0.37721	0.47907	0.69849	0.53531	-0.62302	0.52932	0.42603	0.57704	-0.45841	0.52386	0.44692	0.5397	-0.16121	0.53512	0.39071	-0.32643	-0.67323	0.42023		Gs	*		*	*				**		*	**	*	**	*		*		*		*
Ci	-0.46613	-0.35545	-0.24482	-0.45665	-0.75353	-0.60206	-0.68179	0.37721	1	0.7641	0.30999	0.77859	-0.37535	0.3556	0.49721	0.47545	-0.47814	0.21208	-0.00755	0.24076	-0.3217	0.81333	-0.15796	-0.03336	-0.24286	0.53372		Ci					**	**	**		**	**		**			*	*	*
Tr	-0.79739	-0.71748	-0.64335	-0.84218	-0.55987	-0.90317	-0.90973	0.47907	0.7641	1	0.30527	0.86662	-0.70106	0.74939	0.81496	0.84697	-0.85418	0.64382	0.42036	0.65192	-0.1723	0.87324	-0.35972	-0.41	-0.57643	0.82207		Tr	**	**	**	**	*	**	**	*	**	**		**	**	**	**	**	**	**		**
Proline	-0.24899	-0.0741	-0.25338	-0.37198	-0.45279	-0.14753	-0.33545	0.69849	0.30999	0.30527	1	0.52926	-0.45464	0.13897	0.18648	0.26103	-0.26436	0.38096	0.32043	0.46981	-0.22697	0.56169	0.29257	0.07968	-0.39871	-0.02787		Proline								**			**	*								*
Relative conductivity	-0.67912	-0.5855	-0.53115	-0.72767	-0.64507	-0.76306	-0.79195	0.53531	0.77859	0.86662	0.52926	1	-0.68912	0.59426	0.73677	0.64949	-0.76609	0.60159	0.41077	0.63413	-0.10669	0.92157	-0.36338	-0.26953	-0.52284	0.50897		Relative conductivity	**	*	*	**	**	**	**	*	**	**	*	**	**	**	**	**	**	**		**
Soluble sugar	0.91272	0.77797	0.92281	0.79707	0.12071	0.59963	0.76442	-0.62302	-0.37535	-0.70106	-0.45464	-0.68912	1	-0.91765	-0.91494	-0.85644	0.88609	-0.87427	-0.81628	-0.84187	-0.35368	-0.70133	0.16585	0.77992	0.94139	-0.5643		Soluble sugar	**	**	**	**		**	**	**		**		**	**	**	**	**	**	**	**	**
Soluble protein	-0.93863	-0.87997	-0.9319	-0.80848	0.00437	-0.68055	-0.74426	0.52932	0.3556	0.74939	0.13897	0.59426	-0.91765	1	0.9424	0.91993	-0.91454	0.83701	0.75989	0.77326	0.345	0.59416	-0.2605	-0.86438	-0.90617	0.76355		Soluble protein	**	**	**	**		**	**	*		**		**	**	**	**	**	**	**	**	**
POD	-0.96245	-0.85605	-0.89819	-0.83149	-0.2057	-0.73519	-0.85167	0.42603	0.49721	0.81496	0.18648	0.73677	-0.91494	0.9424	1	0.87673	-0.96168	0.8276	0.72421	0.77908	0.38476	0.72454	-0.43752	-0.78689	-0.82038	0.68589		POD	**	**	**	**		**	**		*	**		**	**	**	**	**	**	**	**	**
SOD	-0.91504	-0.78869	-0.86222	-0.85401	-0.17515	-0.80347	-0.83747	0.57704	0.47545	0.84697	0.26103	0.64949	-0.85644	0.91993	0.87673	1	-0.88778	0.81666	0.6862	0.7856	0.13465	0.68668	-0.23359	-0.74731	-0.82209	0.81314		SOD	**	**	**	**		**	**	*	*	**		**	**	**	**	**	**	**	**	**
CAT	0.92813	0.89738	0.89633	0.926	0.2456	0.74826	0.85337	-0.45841	-0.47814	-0.85418	-0.26436	-0.76609	0.88609	-0.91454	-0.96168	-0.88778	1	-0.8833	-0.76287	-0.86033	-0.28373	-0.73213	0.50302	0.69953	0.80385	-0.69215		CAT	**	**	**	**		**	**		*	**		**	**	**	**	**	**	**	**	**
Cd content in shoot	-0.79017	-0.84744	-0.9057	-0.82414	-0.00619	-0.53906	-0.66389	0.52386	0.21208	0.64382	0.38096	0.60159	-0.87427	0.83701	0.8276	0.81666	-0.8833	1	0.96222	0.98969	0.42619	0.49723	-0.364	-0.74076	-0.82117	0.45811		Cd content in shoot	**	**	**	**		*	**	*		**		**	**	**	**	**	**	**	**	**
Cd content in root	-0.68514	-0.76647	-0.87379	-0.67756	0.21132	-0.3271	-0.48882	0.44692	-0.00755	0.42036	0.32043	0.41077	-0.81628	0.75989	0.72421	0.6862	-0.76287	0.96222	1	0.93933	0.59051	0.29018	-0.30285	-0.7751	-0.79593	0.2681		Cd content in root	**	**	**	**			*						**	**	**	**	**	**	**	**	**
Translocation factor	-0.7408	-0.8062	-0.85947	-0.82806	-0.08794	-0.52914	-0.66568	0.5397	0.24076	0.65192	0.46981	0.63413	-0.84187	0.77326	0.77908	0.7856	-0.86033	0.98969	0.93933	1	0.34865	0.52442	-0.35526	-0.64671	-0.77636	0.41785		Translocation factor	**	**	**	**		*	**	*		**	*	**	**	**	**	**	**	**	**	**
Nramp2	-0.32424	-0.33405	-0.47466	-0.04612	0.43426	0.17485	-0.01408	-0.16121	-0.3217	-0.1723	-0.22697	-0.10669	-0.35368	0.345	0.38476	0.13465	-0.28373	0.42619	0.59051	0.34865	1	-0.20444	-0.37787	-0.64199	-0.34755	-0.19046		Nramp2			*																**		**
Nramp5	-0.73548	-0.49669	-0.5306	-0.74902	-0.72154	-0.77133	-0.84176	0.53512	0.81333	0.87324	0.56169	0.92157	-0.70133	0.59416	0.72454	0.68668	-0.73213	0.49723	0.29018	0.52442	-0.20444	1	-0.21172	-0.23785	-0.56106	0.60723		Nramp5	**	*	*	**	**	**	**	*	**	**	*	**	**	**	**	**	**	*		*
HMA3	0.3272	0.49508	0.27855	0.38894	0.19426	0.38543	0.33754	0.39071	-0.15796	-0.35972	0.29257	-0.36338	0.16585	-0.2605	-0.43752	-0.23359	0.50302	-0.364	-0.30285	-0.35526	-0.37787	-0.21172	1	0.20293	0.03112	-0.15221		HMA3		*															*
HMA4	0.78216	0.70121	0.86166	0.53061	-0.33278	0.44264	0.51832	-0.32643	-0.03336	-0.41	0.07968	-0.26953	0.77992	-0.86438	-0.78689	-0.74731	0.69953	-0.74076	-0.7751	-0.64671	-0.64199	-0.23785	0.20293	1	0.76746	-0.4752		HMA4	**	**	**	*			*						**	**	**	**	**	**	**	**	**
WRKY6	0.85383	0.74262	0.88957	0.73145	-0.0614	0.45045	0.5996	-0.67323	-0.24286	-0.57643	-0.39871	-0.52284	0.94139	-0.90617	-0.82038	-0.82209	0.80385	-0.82117	-0.79593	-0.77636	-0.34755	-0.56106	0.03112	0.76746	1	-0.56454		WRKY6	**	**	**	**			**	**		*		*	**	**	**	**	**	**	**	**
SAMT	-0.7085	-0.66752	-0.57948	-0.71457	-0.24684	-0.7872	-0.69409	0.42023	0.53372	0.82207	-0.02787	0.50897	-0.5643	0.76355	0.68589	0.81314	-0.69215	0.45811	0.2681	0.41785	-0.19046	0.60723	-0.15221	-0.4752	-0.56454	1		SAMT	**	**	*	**		**	**		*	**		*	*	**	**	**	**
[truncated: 5 more columns]
